# Supplementary material
Source: PubMed Central journal article supplement (PMC3793126)

Figure S1

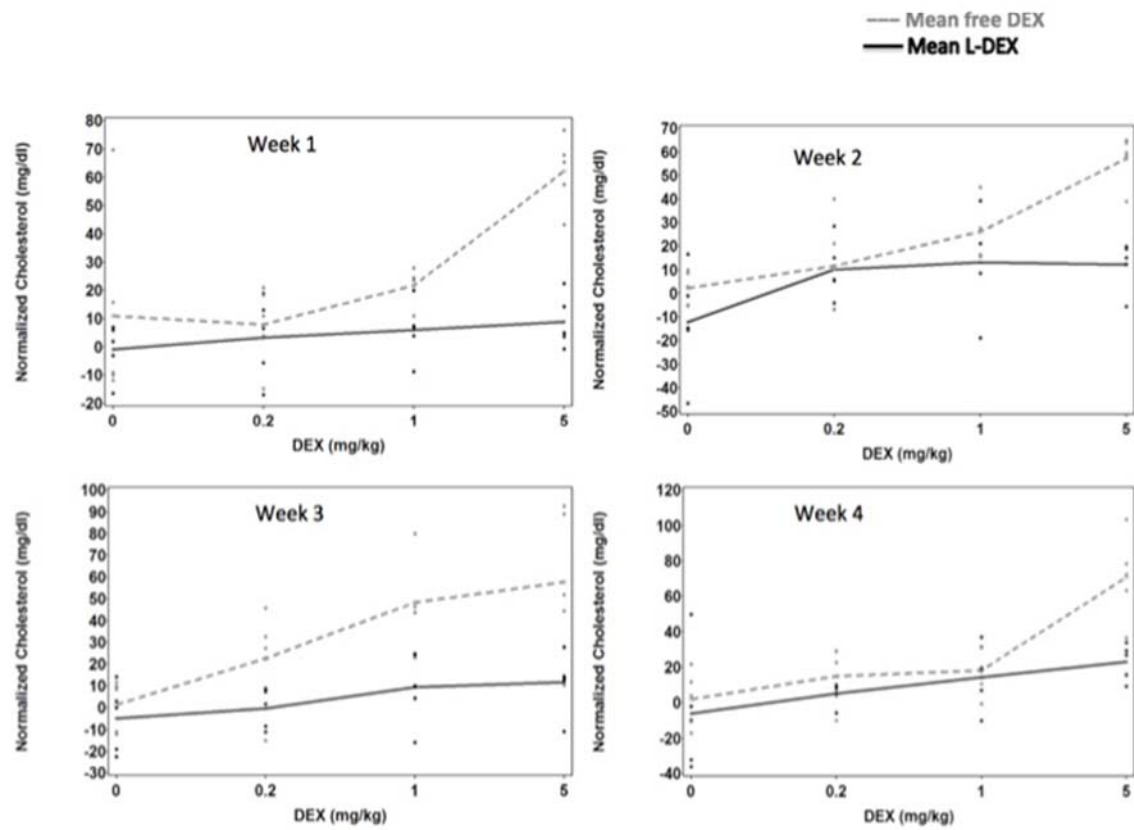

Supplement: NIHMS524544-supplement-supplementary_Figure_1.pdf [file NIHMS524544-supplement-supplementary_Figure_1.pdf]
